# Supplementary material
Source: PubMed Central journal article supplement (PMC5241723)

## **P-glycoprotein Structures Reveal Asymmetric ATP Binding and a Mechanism of Substrate Polyspecificity**

Lothar Esser<sup>1\*</sup>, Fei Zhou<sup>1\*</sup>, Kristen M. Pluchino<sup>1</sup>, Joseph Shiloach<sup>2</sup>, Jichun Ma<sup>1</sup>, Wai-  
kwan Tang<sup>1</sup>, Camilo Gutierrez<sup>1</sup>, Alexander Zhang<sup>1</sup>, Suneet Shukla<sup>1</sup>, James P.  
Madigan<sup>1</sup>, Tongqing Zhou<sup>3</sup>, Peter Kwong<sup>3</sup>, Suresh V. Ambudkar<sup>1</sup>, Michael M.  
Gottesman<sup>1</sup>, and Di Xia<sup>1#</sup>

**Supplemental Information**

## Supplemental Tables

**Table S1. Rms deviations (Å) from global structure alignments among various P-gp variants.**

|                                      | 4M1M <sup>a</sup> | $\Delta^{\text{Ink}}$ mP-gp | $\Delta^{\text{Ink}}$ mP-gp +Hg | $\Delta^{\text{Ink}}$ mP-gp +ATP | 4Q9H <sup>b</sup> | <sup>FL</sup> mP-gp <sup>Me</sup> | <sup>FL</sup> mP-gp | 4F4C <sup>c</sup> |
|--------------------------------------|-------------------|-----------------------------|---------------------------------|----------------------------------|-------------------|-----------------------------------|---------------------|-------------------|
| <b>4M1M</b>                          | 3.34 <sup>d</sup> | 0.92 <sup>e</sup>           | 0.97                            | 0.91                             | 6.14              | 6.19                              | 1.28                | 4.00 <sup>h</sup> |
| $\Delta^{\text{Ink}}$ mP-gp          | 3.01 <sup>f</sup> | 2.76                        | 0.93                            | 0.76                             | 5.76              | 5.80                              | 1.23                | 4.30 <sup>h</sup> |
| $\Delta^{\text{Ink}}$ mP-gp Hg       | 3.25              | 3.18                        | 3.43                            | 0.75 <sup>a</sup>                | 6.35              | 6.40                              | 1.31                | 4.32 <sup>h</sup> |
| $\Delta^{\text{Ink}}$ mP-gp +ATP     | 2.98              | 2.80                        | 3.20                            | 2.84                             | 6.28              | 6.34                              | 1.23                | 3.30 <sup>h</sup> |
| <b>4Q9H<sup>g</sup></b>              | N/A               | N/A                         | N/A                             | N/A                              | N/A <sup>i</sup>  | 1.08                              | 5.26                | 2.32 <sup>h</sup> |
| <sup>FL</sup> mP-gp <sup>Me(g)</sup> | N/A               | N/A                         | N/A                             | N/A                              | N/A               | N/A                               | 5.32                | 2.29 <sup>h</sup> |
| <sup>FL</sup> mP-gp                  | 2.81              | 2.81                        | 2.39                            | 2.81                             | N/A               | N/A                               | 2.52                | 3.84 <sup>h</sup> |
| <b>4F4C<sup>g</sup></b>              | N/A               | N/A                         | N/A                             | N/A                              | N/A               | N/A                               | N/A                 | N/A               |

a – Coordinates from mP-gp with bound mercury (1).

b – Coordinates from fully methylated mP-gp (2).

c – Coordinates from *C. elegans* P-gp (3).

d - Numbers in the diagonal are the superposition of two independent molecules (chain B to chain A from residues 40 to 1269) within the same crystallographic asymmetric unit of the same crystal, using Isq in Coot.

e – Numbers in the upper triangle are the superposition of molecules chain A of one crystal to chain A of another crystal (residues 40 to 1269), using Isq in Coot and CA atoms only.

f – Numbers in the lower triangle are the superposition of molecules chain A of one crystal to chain B of another (residues 40 to 1269), using Isq in Coot and CA atoms only.

g – These structures have one molecule per asymmetric unit.

h – alignments are done with molecule A if applicable using SSM in Coot.

i – Structure alignment is not applicable.

**Table S2. Rms deviations (Å) of superposed NBDs of P-gp variants from different crystals**

|                                    |      | $\Delta^{\text{Ink}}$ mP-gp (A) |                   | $\Delta^{\text{Ink}}$ mP-gp (B) |      | $^{\text{FL}}$ mP-gp <sup>Me</sup> |      | $^{\text{FL}}$ mP-gp (A) |      | $^{\text{FL}}$ mP-gp (B) |      |
|------------------------------------|------|---------------------------------|-------------------|---------------------------------|------|------------------------------------|------|--------------------------|------|--------------------------|------|
|                                    |      | NBD1 <sup>a</sup>               | NBD2 <sup>b</sup> | NBD1                            | NBD2 | NBD1                               | NBD2 | NBD1                     | NBD2 | NBD1                     | NBD2 |
| $\Delta^{\text{Ink}}$ mP-gp (A)    | NBD1 | -                               | 0.97              | 0.32                            | 0.94 | 0.72                               | 0.92 | 0.40                     | 0.97 | 0.47                     | 1.04 |
|                                    | NBD2 |                                 | -                 | 0.93                            | 0.46 | 1.18                               | 0.76 | 0.99                     | 0.51 | 0.99                     | 0.86 |
| $\Delta^{\text{Ink}}$ mP-gp (B)    | NBD1 |                                 |                   | -                               | 0.94 | 0.75                               | 0.91 | 0.48                     | 0.92 | 0.39                     | 1.02 |
|                                    | NBD2 |                                 |                   |                                 | -    | 1.17                               | 0.80 | 1.00                     | 0.65 | 1.02                     | 0.80 |
| $^{\text{FL}}$ mP-gp <sup>Me</sup> | NBD1 |                                 |                   |                                 |      | -                                  | 1.08 | 0.87                     | 1.20 | 0.79                     | 1.15 |
|                                    | NBD2 |                                 |                   |                                 |      |                                    | -    | 1.03                     | 0.80 | 0.95                     | 0.84 |
| $^{\text{FL}}$ mP-gp (A)           | NBD1 |                                 |                   |                                 |      |                                    |      | -                        | 1.07 | 0.38                     | 1.06 |
|                                    | NBD2 |                                 |                   |                                 |      |                                    |      |                          | -    | 0.97                     | 0.82 |
| $^{\text{FL}}$ mP-gp (B)           | NBD1 |                                 |                   |                                 |      |                                    |      |                          |      | -                        | 1.06 |
|                                    | NBD2 |                                 |                   |                                 |      |                                    |      |                          |      |                          | -    |

a –NBD1 fragment in the residue range 387 to 620 was used for alignment, using SSM in Coot.  
b –NBD2 fragment in the residue range 1028 to 1267 was used for alignment, using SSM in Coot

**Table S3. Rms deviations (Å) of superposed helical regions of P-gp variants from different crystals**

|                                    |     | $\Delta_{\text{Ink}}$ mP-gp (A) |                  | $\Delta_{\text{Ink}}$ mP-gp (B) |      | $^{\text{FL}}$ mP-gp <sup>Me</sup> |      | $^{\text{FL}}$ mP-gp (A) |      | $^{\text{FL}}$ mP-gp (B) |      |
|------------------------------------|-----|---------------------------------|------------------|---------------------------------|------|------------------------------------|------|--------------------------|------|--------------------------|------|
|                                    |     | HR1 <sup>a</sup>                | HR2 <sup>b</sup> | HR1                             | HR2  | HR1                                | HR2  | HR1                      | HR2  | HR1                      | HR2  |
| $\Delta_{\text{Ink}}$ mP-gp (A)    | HR1 | -                               | 2.10             | 0.55                            | 2.16 | 0.95                               | 2.62 | 0.42                     | 2.04 | 0.57                     | 2.18 |
|                                    | HR2 |                                 | -                | 2.09                            | 0.85 | 2.19                               | 1.69 | 2.23                     | 0.28 | 2.10                     | 0.77 |
| $\Delta_{\text{Ink}}$ mP-gp (B)    | HR1 |                                 |                  | -                               | 2.12 | 1.04                               | 2.42 | 0.58                     | 2.12 | 0.35                     | 2.04 |
|                                    | HR2 |                                 |                  |                                 | -    | 2.21                               | 1.42 | 2.26                     | 0.87 | 2.15                     | 0.35 |
| $^{\text{FL}}$ mP-gp <sup>Me</sup> | HR1 |                                 |                  |                                 |      | -                                  | 4.04 | 0.89                     | 4.99 | 1.04                     | 4.77 |
|                                    | HR2 |                                 |                  |                                 |      |                                    | -    | 2.60                     | 1.67 | 2.54                     | 1.48 |
| $^{\text{FL}}$ mP-gp (A)           | HR1 |                                 |                  |                                 |      |                                    |      | -                        | 2.22 | 0.53                     | 2.18 |
|                                    | HR2 |                                 |                  |                                 |      |                                    |      |                          | -    | 2.14                     | 0.80 |
| $^{\text{FL}}$ mP-gp (B)           | HR1 |                                 |                  |                                 |      |                                    |      |                          |      | -                        | 2.15 |
|                                    | HR2 |                                 |                  |                                 |      |                                    |      |                          |      |                          | -    |

a – HR1 is defined by the residues in the range 30-206, 320-379, and 850-964.

b – HR2 is defined by the residues in the range 692-849, 965-1019, and 207-319.

**Table S4. Rms deviations of different domains in the helical regions based on aligning NBDs of *mPgp* variants to that of chain A of  $\Delta^{\text{Ink}}$  *mP-gp*.**

| <b>Alignment of NBD1</b>                 |                         |                         |                         |                         |
|------------------------------------------|-------------------------|-------------------------|-------------------------|-------------------------|
|                                          | <b>NBD1<sup>a</sup></b> | <b>ICD1<sup>b</sup></b> | <b>TMD1<sup>c</sup></b> | <b>ECD1<sup>d</sup></b> |
| $\Delta^{\text{Ink}}$ <i>mP-gp</i> (A)   | -                       | -                       | -                       | -                       |
| $\Delta^{\text{Ink}}$ <i>mP-gp</i> (B)   | 0.32                    | 1.48                    | 1.43                    | 1.27                    |
| <sup>FL</sup> <i>mP-gp</i> <sup>Me</sup> | 0.73                    | 1.80                    | 2.16                    | 4.85                    |
| <b>4Q9H<sup>e</sup></b>                  | 0.85                    | 2.76                    | 3.65                    | 6.41                    |
| <b>Alignment of NBD2</b>                 |                         |                         |                         |                         |
|                                          | <b>NBD2<sup>a</sup></b> | <b>ICD2<sup>b</sup></b> | <b>TMD2<sup>c</sup></b> | <b>ECD2<sup>d</sup></b> |
| $\Delta^{\text{Ink}}$ <i>mP-gp</i> (A)   | -                       | -                       | -                       | -                       |
| $\Delta^{\text{Ink}}$ <i>mP-gp</i> (B)   | 0.46                    | 0.77                    | 4.3447                  | 5.4632                  |
| <sup>FL</sup> <i>mP-gp</i> <sup>Me</sup> | 0.80                    | 0.95                    | 8.0638                  | 13.5347                 |
| <b>4Q9H</b>                              | 0.94                    | 1.10                    | 8.8983                  | 14.7904                 |

a – NBD1 is defined by residues in the range of 387 – 620; NBD2 is defined by residues in the range of 1028-1267.  
b – ICD1 include residues 140-174, 883-924, and 358-370; ICD2 consists of residues 779-820, 242-278, and 999-1014.  
c – TMD1 include residues in the range of 43-79, 102-139, 175-207, 852-882, 925-963 and 326-357. TMD2 is composed of residues in the range of 702-732, 749-778, 821-850, 106-241, 279-319, and 972-998.  
d - ECD1 is defined by residues 80-101, 316-325; ECD2 is defined by residues in the range of 733-748 and 965-971.  
e – Coordinates obtained from fully methylated *mP-gp* (2).

## Supplemental Figure Legends

**Figure S1. Constructs used in preparing various wild type and mutant mouse P-gp.**

**Figure S2. ATPase activity of isolated mouse P-gp constructs** (A) Basal ATPase activity (nmol Pi released/min/ug protein) of wild-type mP-gp in detergent and in added soy total lipid (1:1 in mg). The activity in lipids serves as 100% in all subsequent comparisons. (B) Linker mutant retains the ability of trapping ADP by vanadate. Both wild-type *mPgp* and  $\Delta^{\text{Ink}}$ *mP-gp* mutant were assayed in the presence or absence of vanadate. (C) Efflux of the fluorescent P-gp substrate Calcein-AM by  $^{\text{FL}}$ *mP-gp*. HeLa cells, which do not express P-gp, were transduced with BacMam baculovirus genetically modified to express  $^{\text{FL}}$ *mP-gp*. Non-transduced HeLa cells (red) and virus-transduced HeLa cells were incubated with 1  $\mu\text{M}$  Calcein-AM in the presence (orange) or absence (cyan) of 100 nM elacridar, a P-gp inhibitor, for 45 mins and transport of fluorescent substrates by flow cytometry was carried out. (D). Efflux of the fluorescent P-gp substrate Calcein-AM by  $\Delta^{\text{Ink}}$ *mP-gp*. Carried out as described in A but with BacMam baculovirus genetically modified to express  $\Delta^{\text{Ink}}$ *mP-gp*. Fluorescence intensity (RFU) correspond to the transport capacity of  $^{\text{FL}}$ *mP-gp* and  $\Delta^{\text{Ink}}$ *mP-gp*. Accumulation of fluorescent substrate Calcein-AM in non-transduced HeLa cells was used as control in both (C) and (D).

**Figure S3. Structure determination for  $\Delta^{\text{Ink}}$ mP-gp by experimental phasing methods**

(A) Figure-Of-Merit (FOM) for SAD phasing as a function of resolution. The black curve represents the FOM as calculated in SHARP in a SAD run using 20 Hg atom positions. The corresponding Phasing Power for acentric reflections is shown in blue and the end point of each bin is marked with a blue rhombus. In DM, 40 cycles of molecular averaging with mask optimization, histogram matching and solvent flattening (64%) results in a resolution-dependent FOM shown in green. (B) Stereo pair: Experimental electron density for a section of mP-gp in the TM region, which is overlaid with an atomic model of mP-gp. (C) Anomalous difference Fourier map calculated at 3.8 Å resolution for the mercurial derivative (Table 1) showing anomalous peaks contoured at  $5\sigma$  shown as wire cages in magenta near all cysteine residues, which are rendered as stick models in yellow and labeled. (D) Anomalous difference Fourier map for the  $\Delta^{\text{Ink}}$ mP-gp (Table 1) showing anomalous signal near some of the methionine residues. The map was contoured at  $2.5\sigma$  (magenta) and  $3.0\sigma$  (cyan) levels, respectively. Overlaid on this map is the structure of mP-gp in cartoon representation and corresponding methionine residues are shown as stick models and labeled.

**Figure S4. Structure of  $\Delta^{\text{Ink}}$ mP-gp and comparisons**

(A) The two molecules of  $\Delta^{\text{Ink}}$ mP-gp in an AU, chains A and B. Chain A is colored and Chain B is in gray. (B) Superposition of the two  $\Delta^{\text{Ink}}$ mP-gp molecules in an AU. Chain A is colored magenta and Chain B is in gray. The distances (Å) between COGs of NBDs are indicated. (C) Comparison of the nucleotide-binding site in the presence and absence of ATP. Two structures were presented: one is  $\Delta^{\text{Ink}}$ mP-gp-ATP complex and another is apo  $\Delta^{\text{Ink}}$ mP-gp.

These two structures are superposed for the NBD1. The bound ATP is shown as stick model with surrounding functional elements color-coded and labeled. The unwinding of C427 in the P-loop (in cyan) when ATP is bound is clearly shown. (D) Crystal packing environment for  $^{FL}mP-gp^{Me}$ , showing a symmetry-related molecule (blue) inserting its ECD into the opening between the two NBDs of another molecule (magenta) in crystal.

Figure S5

### Supplemental Movies

**Movie S1. Topographic change in the putative drug-binding surface of P-gp as a function of the opening and closing of the two halves of P-gp** The morphing study was carried out between the methylated and the linker-deleted protein within 48 steps. The two halves, TMD1 (left) and TMD2 (right), are shown as molecular surfaces, as seen from the inside of the transporter.

### References:

1. Li, J., Jaimes, K. F., and Aller, S. G. (2014) Refined structures of mouse P-glycoprotein. *Protein Sci* **23**, 34-46
2. Szewczyk, P., Tao, H., McGrath, A. P., Villaluz, M., Rees, S. D., Lee, S. C., Doshi, R., Urbatsch, I. L., Zhang, Q., and Chang, G. (2015) Snapshots of ligand entry, malleable binding and induced helical movement in P-glycoprotein. *Acta Crystallogr D Biol Crystallogr* **71**, 732-741
3. Jin, M., Oldham, M. L., Zhang, Q., and Chen, J. (2012) Crystal structure of the multidrug transporter P-glycoprotein from *Caenorhabditis elegans*. *Nature* **490**, 566-569



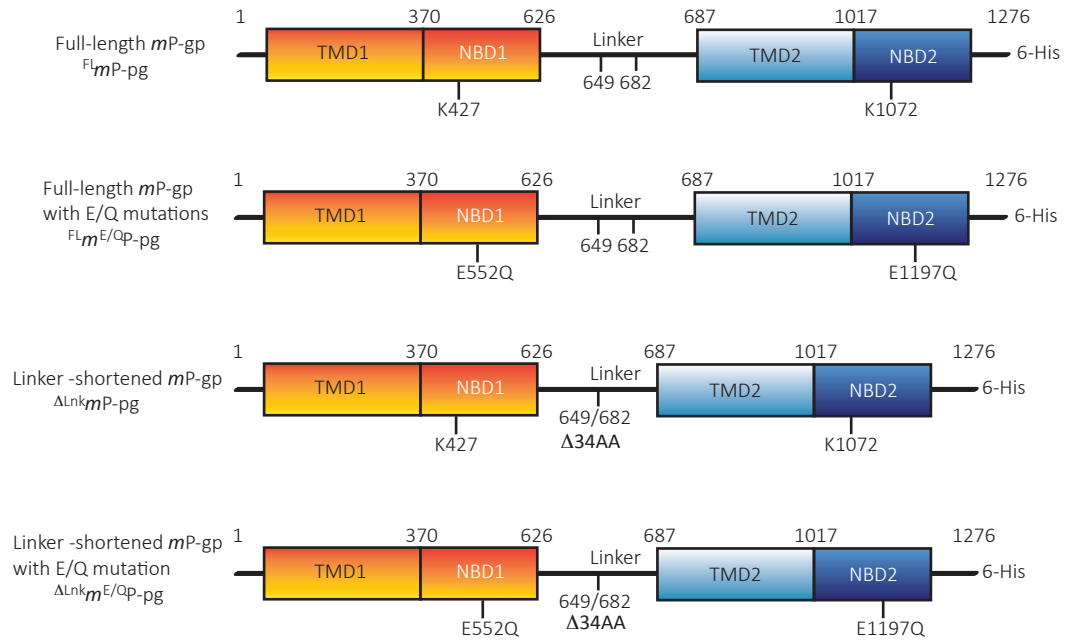

Esser, Zhou et al., Figure S1

**A**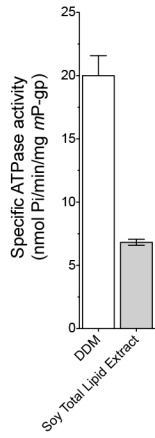**B**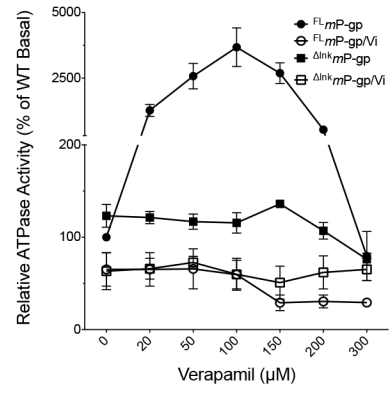**C**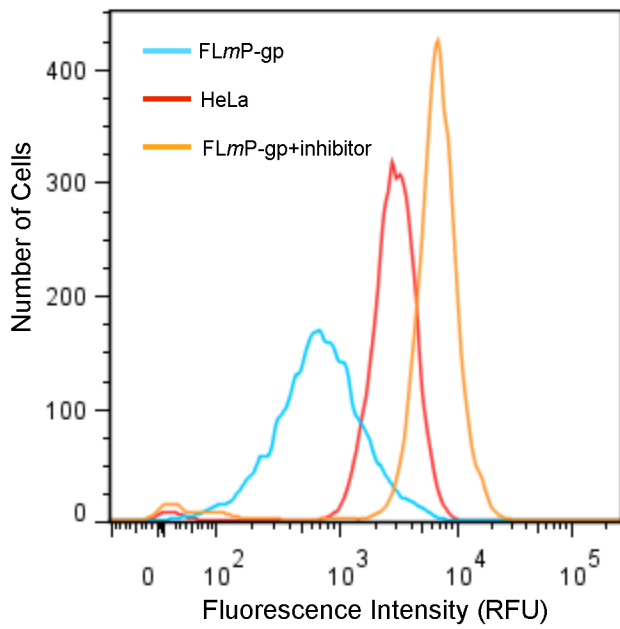**D**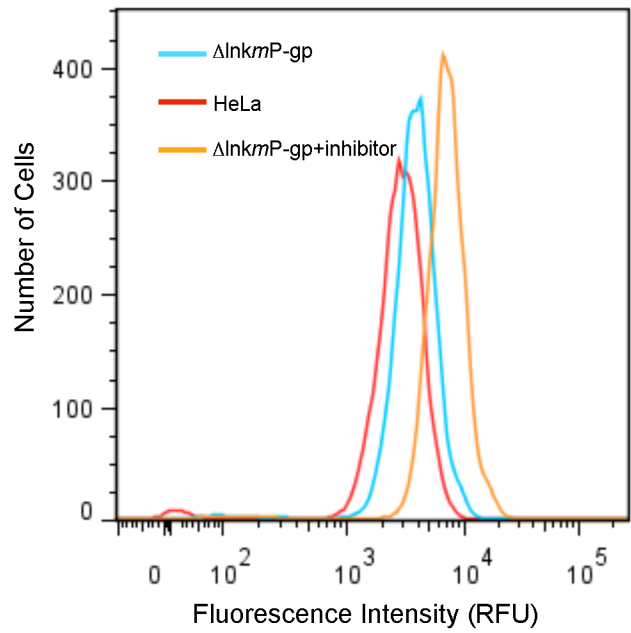

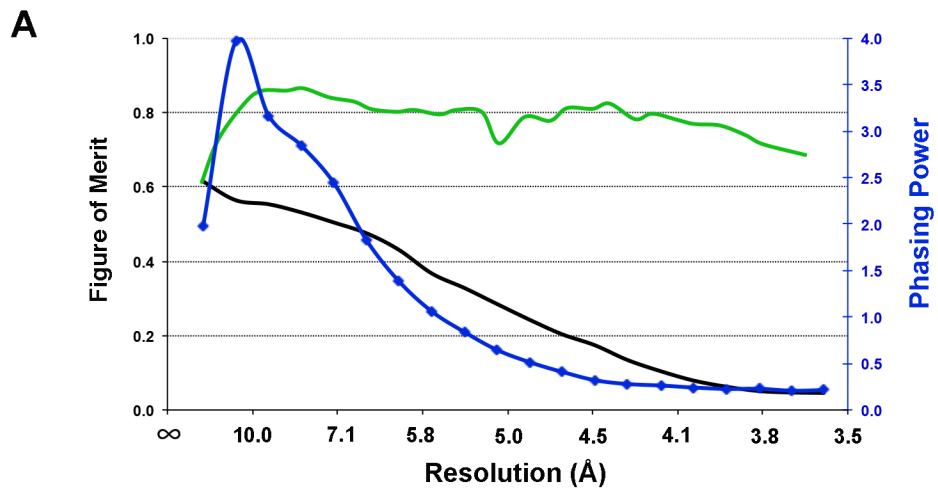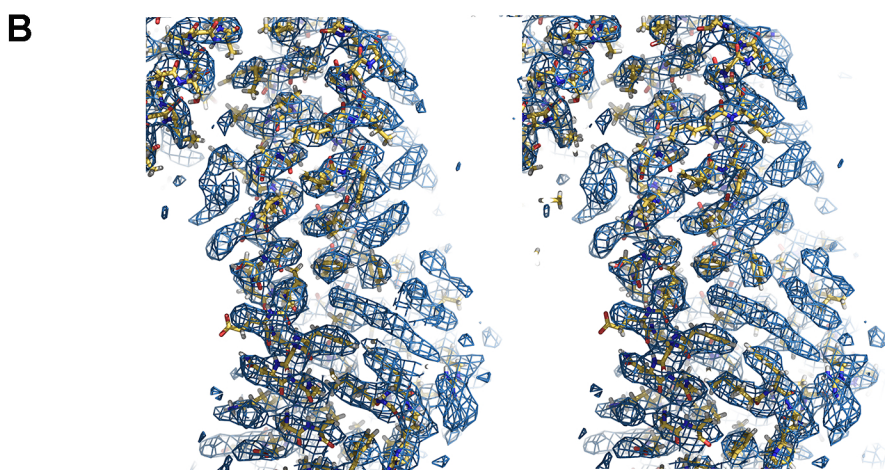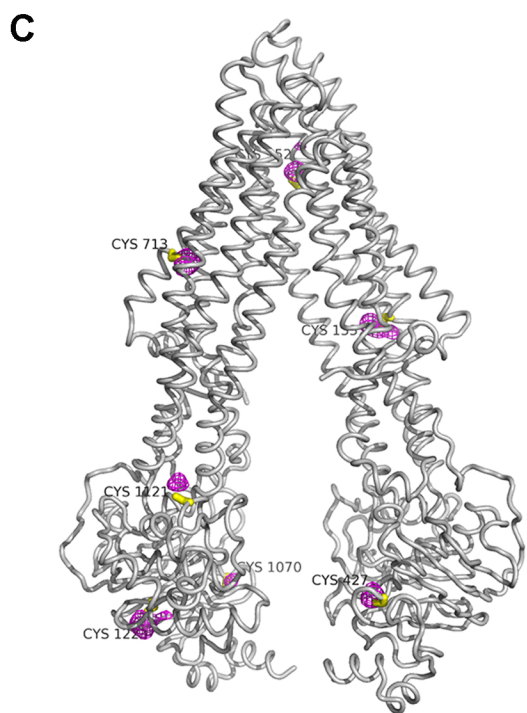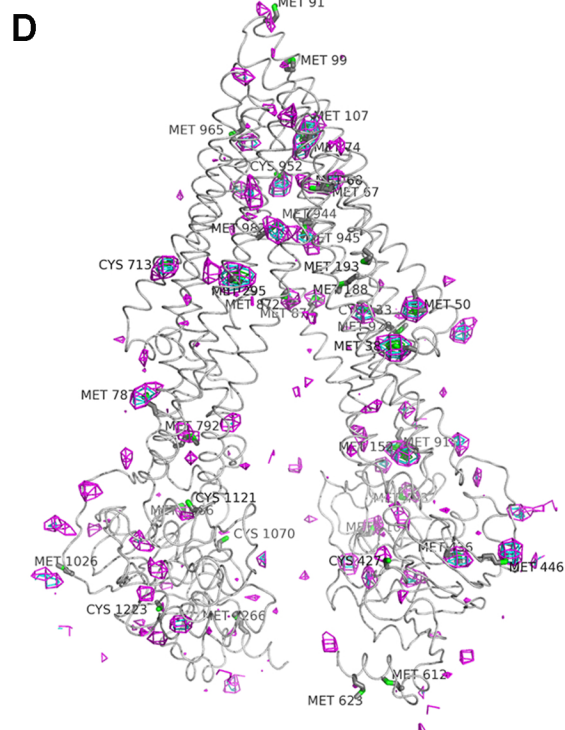

Esser, Zhou et al., Figure S3

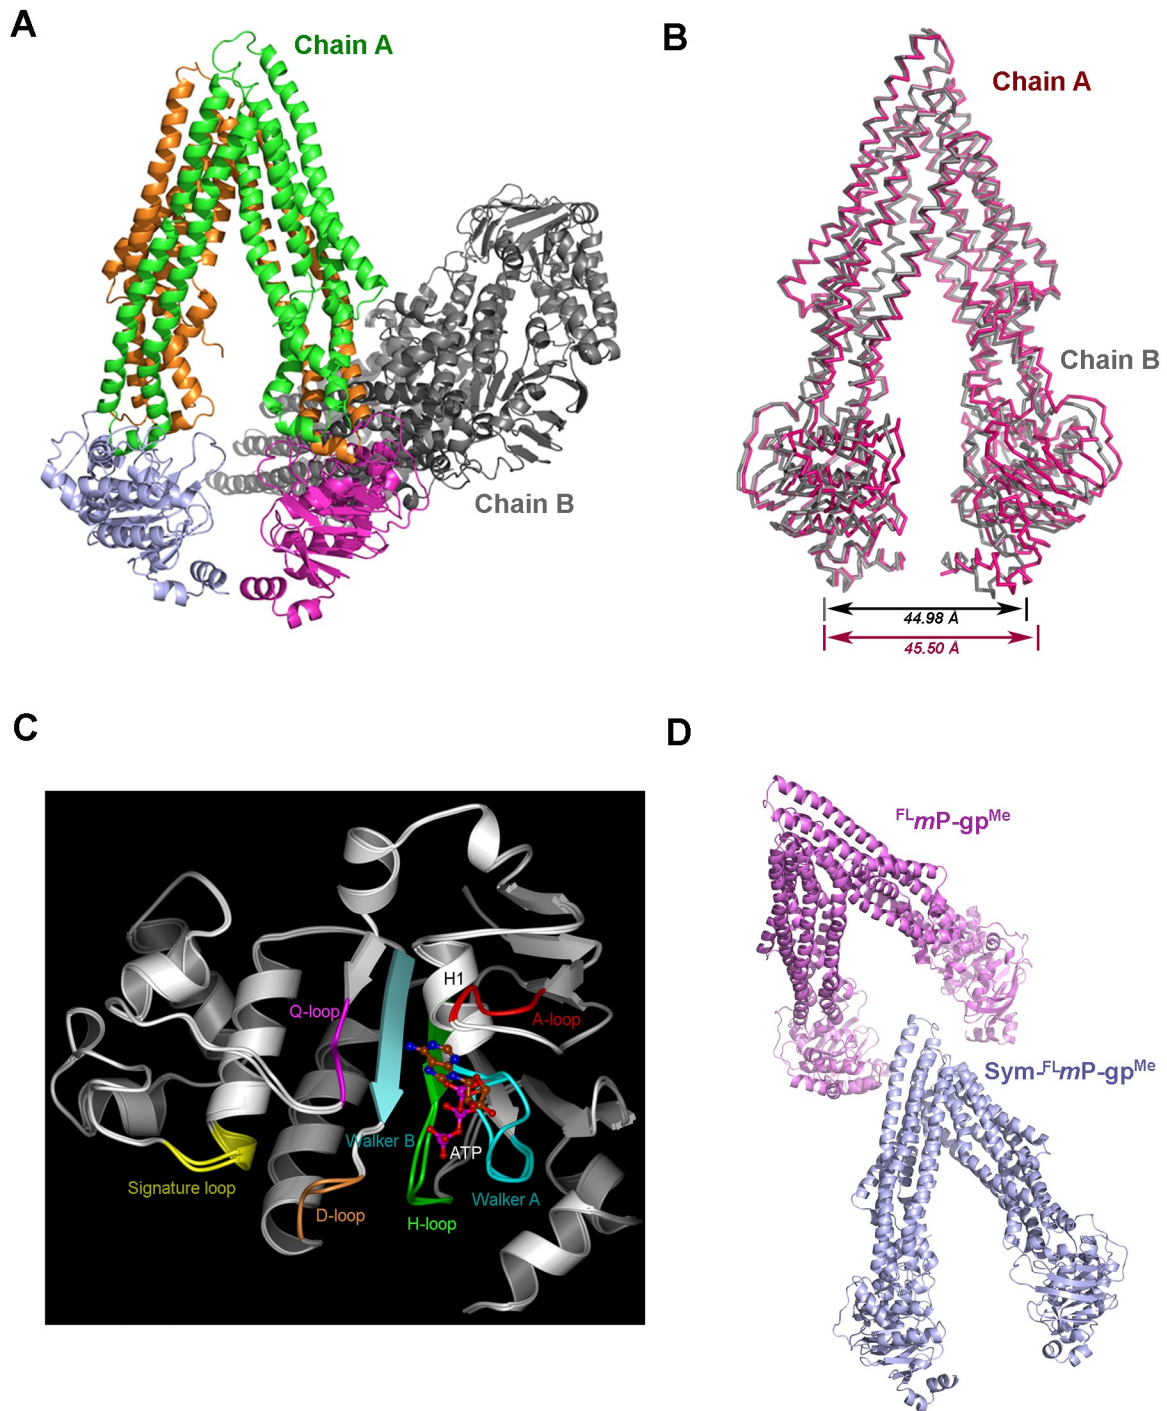

Supplement: supp_M116.755884_SI-rev-submission-11282016.pdf [file supp_M116.755884_SI-rev-submission-11282016.pdf]
